# Supplementary material
Source: PubMed Central journal article supplement (PMC3820329)
Supplement: SD3.pdf [file SD3.pdf]

SUPPLEMENTAL TABLE 1  
 Screening tool for primary health care clinic workers, Zambia

| Statement over the past one month                                          | All the time | Very often | Sometimes | Seldom |
|----------------------------------------------------------------------------|--------------|------------|-----------|--------|
| 1. Are you thinking about too many things or thinking too much?*           | 4            | 3          | 2         | 1      |
| 2. Are you feeling depressed?                                              | 4            | 3          | 2         | 1      |
| 3. Are you feeling anxious?*                                               | 4            | 3          | 2         | 1      |
| 4. Is your sleep disturbed?†                                               | 4            | 3          | 2         | 1      |
| 5. Do you feel it may be better to die?                                    | 4            | 3          | 2         | 1      |
| 6. Do you get less pleasure from things? Loss of pleasurable feelings?     | 4            | 3          | 2         | 1      |
| 7. Do you have difficulty in concentrating?*                               | 4            | 3          | 2         | 1      |
| 8. Have you been experiencing increased heartbeat for the past one month?* | 4            | 3          | 2         | 1      |
| 9. Do you experience less desire for food?                                 | 4            | 3          | 2         | 1      |
| 10. Do you feel tired for no apparent reason?                              | 4            | 3          | 2         | 1      |

\*Item identifies anxiety; other items identify depression.

†Item possibly related to both conditions.
